# Supplementary material for: Association of Upfront Peptide Receptor Radionuclide Therapy With Progression-Free Survival Among Patients With Enteropancreatic Neuroendocrine Tumors
Source: PubMed Central journal article supplement (PMC8874344; doi:10.1001/jamanetworkopen.2022.0290), 2022-02-24

## Supplementary Online Content

Pusceddu S, Prinzi N, Tafuto S, et al. Association of upfront peptide receptor radionuclide therapy with progression-free survival among patients with enteropancreatic neuroendocrine tumors. *JAMA Netw Open*. 2022;5(2):e220290.  
doi:10.1001/jamanetworkopen.2022.0290

**eTable.** Distribution of Patients by Treatments (Chemotherapy or Targeted Therapy) Among Patients in Unmatched and Matched Population

**eFigure 1.** Multicenter, Retrospective, Italian (It.a.net) Cohort Study Design

**eFigure 2.** Standardized Bias Before and After Propensity Score Matching for All Variables

**eFigure 3.** Kernel Density Plot

This supplementary material has been provided by the authors to give readers additional information about their work.

## Supplemental Material

**eTable.** Distribution of patients by treatments (Chemotherapy or Targeted Therapy) among patients in unmatched and matched population

**eFigure 1.** Multicenter, Retrospective, Italian (It.a.net) cohort study design

**eFigure 2.** Standardized bias before and after propensity score matching for all variables

**eFigure 3.** Kernel density plot. The curves represent the distribution of propensity score among the two groups **(A)** before the matching and **(B)** after the matching

**eTable.** Distribution of patients by treatments (Chemotherapy or Targeted Therapy) among patients in unmatched and matched population.

|                                                                           | Total, n (%) | CT/TT up-front<br>n(%) | PRRT up-front<br>n(%) |
|---------------------------------------------------------------------------|--------------|------------------------|-----------------------|
| <i>Unmatched population<br/>CT /TT (upfront- Second line)<br/>(n=179)</i> |              |                        |                       |
| Chemotherapy                                                              | 121 (67.6)   |                        |                       |
| • CDDP or OHP based                                                       | -            | 74 (61.2)              | -                     |
| • TMZ based                                                               | -            | 12 (9.9)               | -                     |
| • 5-FU based                                                              | -            | 15 (12.4)              | -                     |
| • Unknown                                                                 | -            | 20 (16.5)              | -                     |
| Targeted Therapy                                                          | 58 (32.4)    |                        |                       |
| • Everolimus                                                              | -            | 55 (94.8)              | -                     |
| • Sunitinib                                                               | -            | 3 (5.2)                | -                     |
| <i>Unmatched population<br/>CT /TT (Third line)<br/>(n= 116)</i>          |              |                        |                       |
| Chemotherapy                                                              | 52 (44.8)    |                        |                       |
| • CDDP or OHP based                                                       | -            | -                      | 14 (26.9)             |
| • TMZ based                                                               | -            | -                      | 21 (40.4)             |
| • 5-FU based                                                              | -            | -                      | 12 (23.1)             |
| • Unknown                                                                 | -            | -                      | 5 (9.6)               |
| Targeted therapy                                                          | 64 (55.2)    |                        |                       |
| • Everolimus                                                              | -            | -                      | 53 (82.8)             |
| • Sunitinib                                                               | -            | -                      | 11 (17.2)             |
| <i>Matched population<br/>CT /TT (upfront- Second line)<br/>(n=111)</i>   |              |                        |                       |
| Chemotherapy                                                              | 72 (64.9)    |                        |                       |
| CDDP or OHP based                                                         | -            | 43 (59.7)              | -                     |
| TMZ based                                                                 | -            | 10 (13.9)              | -                     |
| 5-FU based                                                                | -            | 12 (16.7)              | -                     |
| Unknown                                                                   | -            | 7 (9.7)                | -                     |
| Targeted therapy                                                          | 39 (35.1)    |                        |                       |
| Everolimus                                                                | -            | 36 (92.3)              | -                     |
| Sunitinib                                                                 | -            | 3 (7.7)                | -                     |
| <i>Matched population<br/>CT /TT (Third line)</i>                         |              |                        |                       |

| <i>(n=25)</i>     |          |   |         |
|-------------------|----------|---|---------|
| Chemotherapy      | 10 (40%) |   |         |
| CDDP or OHP based | -        | - | 1 (20)  |
| TMZ based         | -        | - | 8 (80)  |
| 5-FU              | -        | - | 1 (20)  |
| Targeted Therapy  | 15 (60%) |   |         |
| Everolimus        | -        | - | 12 (80) |
| Sunitinib         | -        | - | 3 (20)  |

CT: Chemotherapy, TT: target therapy including treatment with everolimus or sunitinib; PRRT: peptide receptor radionuclide therapy; TMZ: Temozolomide; OHP: Oxaliplatin; 5FU: 5-Fluorouracil.

**eFigure 1.** Multicenter, Retrospective, Italian (It.a.net) cohort study. Study design.

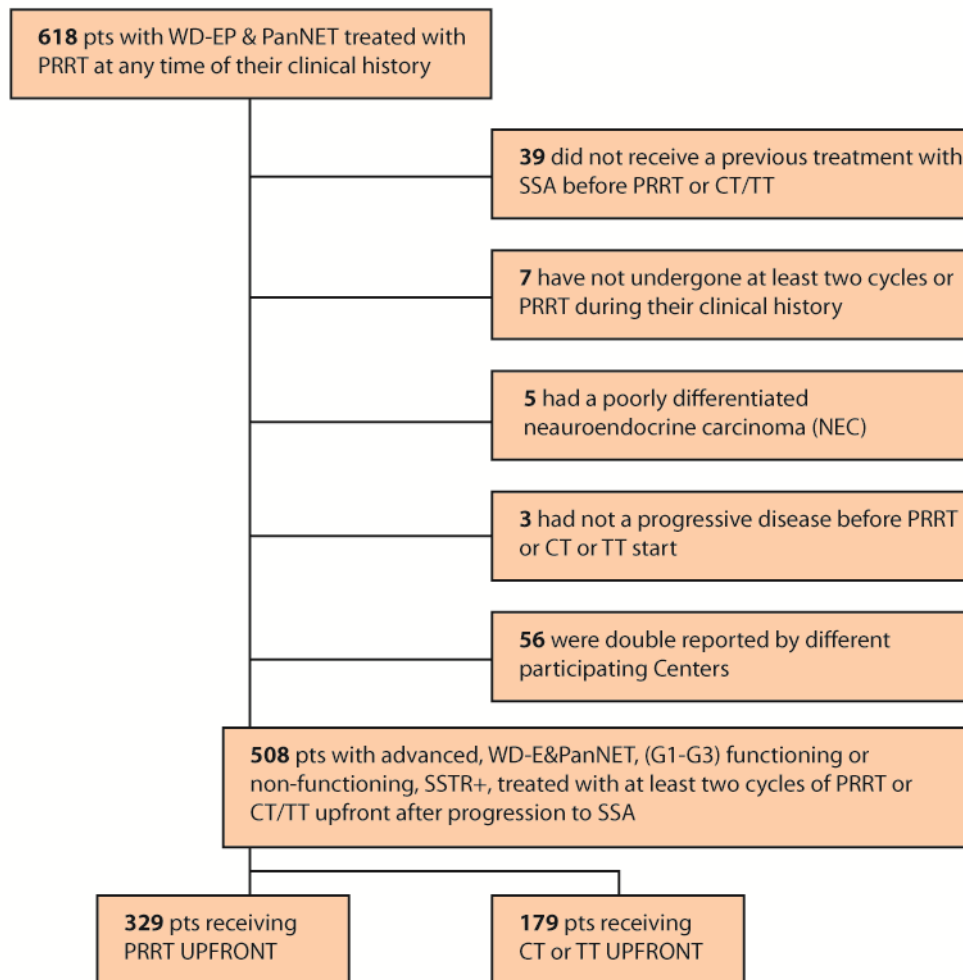

WD: Well-differentiated; E-P: entero-pancreatic; PRRT: Peptide Receptor Radionuclide Therapy; NET: neuroendocrine tumor; SSTR+: Somatostatic Receptors positivity; SSA: somatostatin analogues; CT: chemotherapy; TT: Targeted Therapy

**eFigure 2.** Standardized bias before and after propensity score matching for all variables.

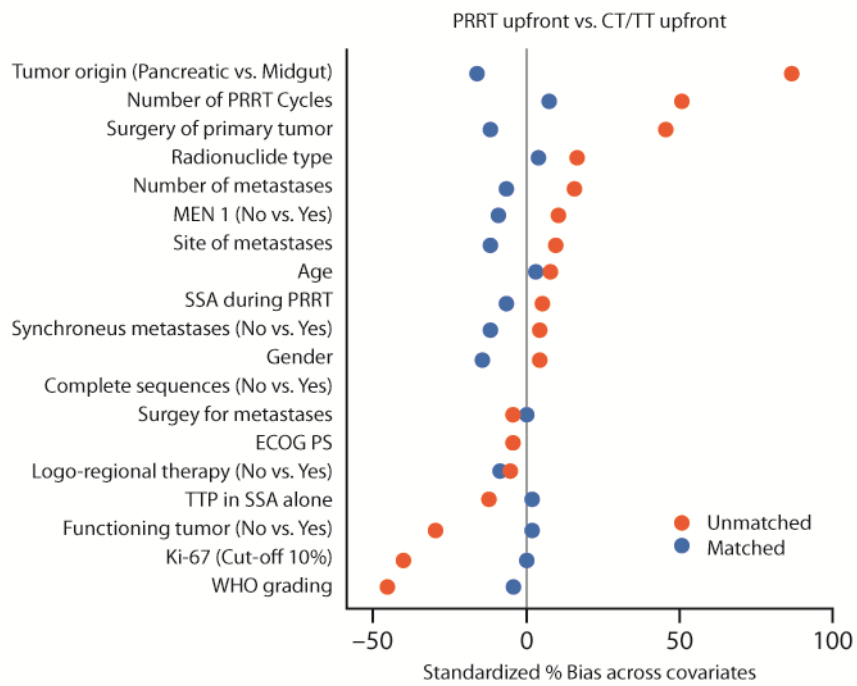

**eFigure 3.** Kernel density plot. The curves represent the distribution of propensity score among the two groups **(A)** before the matching and **(B)** after the matching.

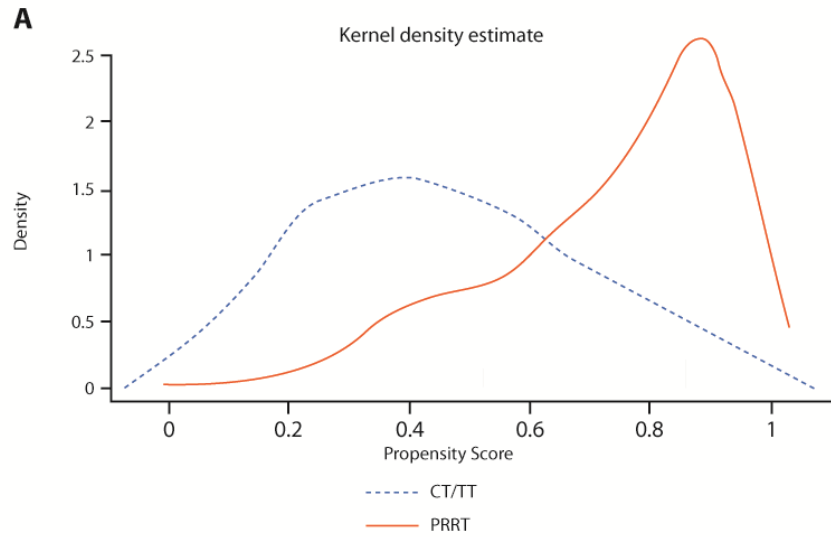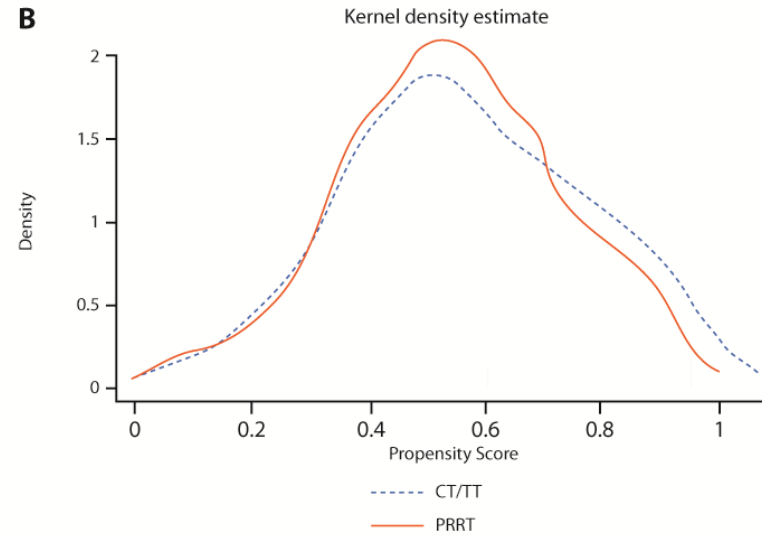

Supplement: jamanetwopen-e220290-s001.pdf [file jamanetwopen-e220290-s001.pdf]
